# Supplementary material for: Blood parasites (Trypanosoma, Leucocytozoon, Haemoproteus) in the Eurasian sparrowhawk (Accipiter nisus): diversity, incidence and persistence of infection at the individual level
Source: PubMed Central journal article supplement (PMC9840293; doi:10.1186/s13071-022-05623-x), 2023-01-14

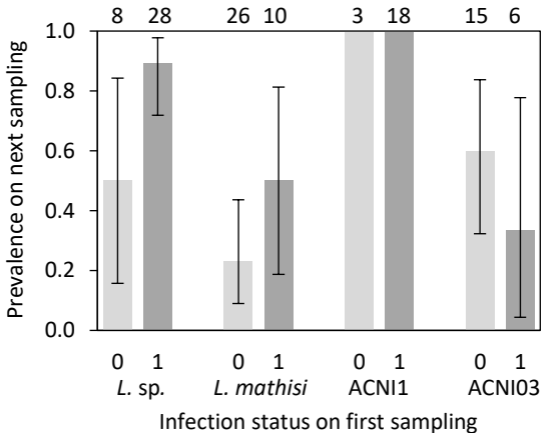

Supplement: 13071_2022_5623_MOESM5_ESM.pdf [file 13071_2022_5623_MOESM5_ESM.pdf]
